# Supplementary material for: Unlocking the Medicinal Mysteries: Preventing Lacunar Stroke with Drug Repurposing
Source: MDPI journal article supplement (doi:10.3390/biomedicines12010017), 2023-12-20
Supplement: s1 [file s1]

**Table S1. all potential modifiable risk factors classification groups.**

| modifiable risk factors          | specific exposures                    |
|----------------------------------|---------------------------------------|
| <b>anthropometry</b>             | waist-to-hip ratio (WHR)              |
|                                  | Body fat                              |
|                                  | Height                                |
|                                  | Body Mass Index (BMI)                 |
|                                  | Bone mineral density                  |
|                                  | Childhood BMI                         |
|                                  | Birth weight                          |
| <b>socioeconomic factors</b>     | Education                             |
|                                  | intelligence                          |
| <b>lifestyle/dietary factors</b> | diphenylamine (DPA)                   |
|                                  | smoking (number)                      |
|                                  | Eicosapentamethic Acid (EPA)          |
|                                  | Linoleic acid (LA; 18:2,n6)           |
|                                  | Coffee                                |
|                                  | Morning person                        |
|                                  | Subjective well-being                 |
|                                  | Arachidonic acid (AA; 20:4,n6)        |
|                                  | Sedentary                             |
|                                  | Carbohydrate                          |
|                                  | Gamma linolenic acid (GLA; 18:3,n6)   |
|                                  | common carotid intima-media thickness |
|                                  | Coronary heart disease                |
|                                  | HDL cholesterol    id:ieu-b-109       |
| <b>cardiometabolic factors</b>   | Total cholesterol                     |
|                                  | homocysteine (Hcy)                    |
|                                  | C-reactive protein (CRP)              |
|                                  | Type 2 diabetes                       |
|                                  | lipoprotein(a)                        |
|                                  | Fasting glucose                       |
|                                  | Heart rate                            |
|                                  | Fasting proinsulin                    |
|                                  | Fasting insulin                       |
|                                  | Pulse pressure                        |
|                                  | apolipoprotein A-I    id:ieu-b-107    |
|                                  | diastolic blood pressure (DBP)        |
|                                  | triglycerides    id:ieu-b-111         |
|                                  | Hypertension                          |
|                                  | Fibrinogen                            |
|                                  | Adiponectin                           |
|                                  | Atrial fibrillation                   |
|                                  | Leptin                                |

|                                   |                                       |
|-----------------------------------|---------------------------------------|
|                                   | LDL cholesterol    id:ieu-b-110       |
|                                   | HbA1C                                 |
|                                   | 2h glucose                            |
|                                   | systolic blood pressure (SBP)         |
|                                   | apolipoprotein B    id:ieu-b-108      |
| <b>endogenous substances</b>      | Serum creatinine                      |
|                                   | vitamin E                             |
|                                   | Uric acid                             |
|                                   | eGFRcrea                              |
|                                   | Blood urea nitrogen                   |
|                                   | Vitamin b12                           |
|                                   | Protein                               |
|                                   | vitamin D                             |
| <b>neuropsychiatric disorders</b> | anorexia nervosa                      |
|                                   | Schizophrenia                         |
|                                   | Neuroticism                           |
|                                   | major depression                      |
|                                   | Parkinson's disease                   |
| <b>other system diseases</b>      | Chronic obstructive pulmonary disease |
|                                   | Rheumatoid Arthritis                  |
|                                   | Osteoporotic fracture                 |
|                                   | Crohn's Disease                       |
|                                   | Asthma                                |

---

**Table S2. Summarised GWAS data for potentially modifiable risk factors that shown significant effects on lacunar stroke in univariable MR.**

| Traits                             | No of Ivs in the study ( $P < 5 \times 10^{-8}$ ) | Gwas                                                                | No of sample                                             | Units                   |
|------------------------------------|---------------------------------------------------|---------------------------------------------------------------------|----------------------------------------------------------|-------------------------|
| SBP                                | 98                                                | Nat Genet. 2018 Oct; 50(10):                                        | over one million                                         | mmHg                    |
| DBP                                | 75                                                | 1412–1425.                                                          | people of European                                       |                         |
| PP                                 | 76                                                |                                                                     | ancestry                                                 |                         |
| HDL cholesterol    id:ieu-b-109    | 257                                               | UK Biobank, Neale lab,                                              | 403,943                                                  | mmol/L                  |
| apolipoprotein A-I    id:ieu-b-107 | 226                                               | <a href="https://gwas.mrcieu.ac.uk/">https://gwas.mrcieu.ac.uk/</a> | 393,193                                                  | mmol/L                  |
| triglycerides    id:ieu-b-111      | 234                                               |                                                                     | 441,016                                                  | mmol/L                  |
| apolipoprotein B    id:ieu-b-108   | 142                                               |                                                                     | 439,214                                                  | mmol/L                  |
| Type 2 diabetes                    | 113                                               | Nature Com. 2018;9(1):2941.                                         | 659,316                                                  | increased t2d risk (OR) |
| Height                             | 290                                               | Nat Genet. 2014 Nov; 46(11): 1173–1186.                             | 253,288                                                  | m                       |
| Education                          | 30                                                | Nature. 2016 May 26;533(7604):539-42.                               | 293,723                                                  | years of schooling      |
| Fasting proinsulin                 | 9                                                 | Diabetes 2011;60(10):2624–2634                                      | 27,079                                                   | pmol/L                  |
| Fibrinogen                         | 33                                                | Hum Mol Genet. 2016 Jan 15; 25(2): 358–370.                         | 120,246                                                  | g/l                     |
| Atrial fibrillation                | 90                                                | Nat Genet. 2018 Sep; 50(9): 1225–1233.                              | over half a million individuals including 65,446 with AF | increased AF risk (OR)  |

**Table S3. Genetic variants included in drug-target analyses for each region.**

| Traits                                       | rsid        | a1 | a2 | a1_freq | effect   | SE       | p-value   |
|----------------------------------------------|-------------|----|----|---------|----------|----------|-----------|
| Adrenergic neurone blockers-DBP              | rs2692938   | A  | G  | 0.7879  | -0.0212  | 0.003346 | 2.36E-10  |
| Adrenergic neurone blockers-DBP              | rs3111873   | C  | G  | 0.6675  | 0.02543  | 0.002903 | 1.948E-18 |
| Adrenergic neurone blockers-PP               | rs10171471  | C  | T  | 0.7366  | 0.0283   | 0.003599 | 3.763E-15 |
| Adrenergic neurone blockers-PP               | rs3111873   | C  | G  | 0.6675  | -0.02408 | 0.003342 | 5.803E-13 |
| Adrenergic neurone blockers-PP               | rs4526784   | C  | G  | 0.3742  | 0.02026  | 0.003236 | 3.832E-10 |
| Adrenergic neurone blockers-SBP              | rs4526784   | C  | G  | 0.3742  | 0.02826  | 0.004899 | 8.022E-09 |
| Alpha-adrenoceptor blockers-DBP              | rs1741288   | A  | G  | 0.6384  | -0.01833 | 0.002847 | 1.201E-10 |
| Alpha-adrenoceptor blockers-DBP              | rs217728    | T  | C  | 0.253   | -0.02238 | 0.00314  | 1.018E-12 |
| Alpha-adrenoceptor blockers-DBP              | rs2735461   | G  | C  | 0.9452  | -0.03409 | 0.005994 | 1.291E-08 |
| Alpha-adrenoceptor blockers-DBP              | rs415196    | T  | C  | 0.2749  | 0.01949  | 0.003072 | 2.224E-10 |
| Alpha-adrenoceptor blockers-DBP              | rs45471201  | T  | C  | 0.09837 | -0.02621 | 0.00461  | 1.308E-08 |
| Alpha-adrenoceptor blockers-DBP              | rs4872453   | C  | T  | 0.2532  | -0.01901 | 0.003128 | 1.221E-09 |
| Alpha-adrenoceptor blockers-PP               | rs141501760 | T  | G  | 0.02859 | -0.06011 | 0.009888 | 1.213E-09 |
| Alpha-adrenoceptor blockers-PP               | rs217728    | T  | C  | 0.253   | -0.03471 | 0.003609 | 6.835E-22 |
| Alpha-adrenoceptor blockers-SBP              | rs112492    | G  | A  | 0.2578  | 0.03341  | 0.005404 | 6.329E-10 |
| Alpha-adrenoceptor blockers-SBP              | rs141501760 | T  | G  | 0.02859 | -0.1035  | 0.014939 | 4.271E-12 |
| Alpha-adrenoceptor blockers-SBP              | rs217728    | T  | C  | 0.253   | -0.05864 | 0.005468 | 7.879E-27 |
| Alpha-adrenoceptor blockers-SBP              | rs2735461   | G  | C  | 0.9452  | -0.06705 | 0.010452 | 1.405E-10 |
| Angiotensin converting enzyme inhibitors-DBP | rs4968783   | A  | C  | 0.6179  | 0.01895  | 0.002808 | 1.494E-11 |
| Angiotensin converting enzyme inhibitors-SBP | rs4968783   | A  | C  | 0.6179  | 0.02998  | 0.004891 | 8.84E-10  |
| Angiotensin-II receptor antagonists-PP       | rs71304101  | A  | G  | 0.1181  | 0.03005  | 0.004854 | 6.011E-10 |
| Beta-adrenoceptor blockers-DBP               | rs11196589  | C  | A  | 0.3982  | -0.01869 | 0.002815 | 3.127E-11 |
| Beta-adrenoceptor blockers-DBP               | rs117624845 | A  | G  | 0.07281 | -0.04545 | 0.005254 | 5.117E-18 |
| Beta-adrenoceptor blockers-DBP               | rs13166730  | T  | C  | 0.17    | -0.02105 | 0.00375  | 1.984E-08 |
| Beta-adrenoceptor blockers-DBP               | rs13242223  | G  | A  | 0.2339  | -0.01808 | 0.003246 | 2.548E-08 |
| Beta-adrenoceptor blockers-DBP               | rs151545    | A  | C  | 0.1256  | 0.02421  | 0.00428  | 1.545E-08 |
| Beta-adrenoceptor blockers-DBP               | rs1741288   | A  | G  | 0.6384  | -0.01833 | 0.002847 | 1.201E-10 |
| Beta-adrenoceptor blockers-DBP               | rs17653278  | G  | C  | 0.05661 | 0.03425  | 0.005883 | 5.825E-09 |
| Beta-adrenoceptor blockers-DBP               | rs180940    | G  | A  | 0.6693  | -0.02813 | 0.002904 | 3.448E-22 |
| Beta-adrenoceptor blockers-DBP               | rs2782980   | C  | T  | 0.7209  | -0.03911 | 0.003033 | 4.961E-38 |
| Beta-adrenoceptor blockers-DBP               | rs2888691   | A  | G  | 0.1496  | 0.0235   | 0.00384  | 9.346E-10 |
| Beta-adrenoceptor blockers-DBP               | rs2907947   | G  | A  | 0.6218  | 0.0198   | 0.002829 | 2.563E-12 |
| Beta-adrenoceptor blockers-DBP               | rs35320559  | C  | T  | 0.2248  | 0.0211   | 0.003274 | 1.161E-10 |
| Beta-adrenoceptor blockers-DBP               | rs3918226   | T  | C  | 0.07838 | -0.08164 | 0.005151 | 1.49E-56  |
| Beta-adrenoceptor blockers-DBP               | rs41313071  | A  | C  | 0.04352 | 0.04068  | 0.006739 | 1.583E-09 |
| Beta-adrenoceptor blockers-DBP               | rs415196    | T  | C  | 0.2749  | 0.01949  | 0.003072 | 2.224E-10 |
| Beta-adrenoceptor blockers-DBP               | rs45471201  | T  | C  | 0.09837 | -0.02621 | 0.00461  | 1.308E-08 |
| Beta-adrenoceptor blockers-DBP               | rs4872453   | C  | T  | 0.2532  | -0.01901 | 0.003128 | 1.221E-09 |

|                                |             |   |   |         |          |          |           |
|--------------------------------|-------------|---|---|---------|----------|----------|-----------|
| Beta-adrenoceptor blockers-DBP | rs68122733  | G | A | 0.1707  | 0.02935  | 0.00363  | 6.195E-16 |
| Beta-adrenoceptor blockers-DBP | rs72829191  | T | C | 0.09773 | -0.02771 | 0.004652 | 2.58E-09  |
| Beta-adrenoceptor blockers-DBP | rs740746    | A | G | 0.7326  | -0.03846 | 0.003084 | 1.092E-35 |
| Beta-adrenoceptor blockers-DBP | rs740956    | C | T | 0.4364  | 0.02149  | 0.002739 | 4.35E-15  |
| Beta-adrenoceptor blockers-DBP | rs741066    | T | C | 0.2942  | -0.01895 | 0.002984 | 2.15E-10  |
| Beta-adrenoceptor blockers-DBP | rs74157560  | T | C | 0.04578 | -0.04864 | 0.006553 | 1.15E-13  |
| Beta-adrenoceptor blockers-DBP | rs75228369  | T | C | 0.04795 | -0.04062 | 0.006536 | 5.152E-10 |
| Beta-adrenoceptor blockers-DBP | rs753482    | A | C | 0.7915  | 0.0249   | 0.003387 | 1.956E-13 |
| Beta-adrenoceptor blockers-DBP | rs77021631  | G | A | 0.1831  | 0.02924  | 0.003519 | 9.571E-17 |
| Beta-adrenoceptor blockers-DBP | rs7737361   | A | G | 0.2028  | 0.02136  | 0.003474 | 7.788E-10 |
| Beta-adrenoceptor blockers-DBP | rs79043825  | A | C | 0.03583 | -0.04211 | 0.007345 | 9.861E-09 |
| Beta-adrenoceptor blockers-DBP | rs855715    | T | G | 0.1177  | 0.04714  | 0.004302 | 6.104E-28 |
| Beta-adrenoceptor blockers-DBP | rs891511    | A | G | 0.3279  | 0.03806  | 0.002942 | 2.771E-38 |
| Beta-adrenoceptor blockers-DBP | rs917875    | C | A | 0.04807 | 0.04424  | 0.006453 | 7.098E-12 |
| Beta-adrenoceptor blockers-PP  | rs74157560  | T | C | 0.04578 | -0.04333 | 0.007505 | 7.772E-09 |
| Beta-adrenoceptor blockers-SBP | rs117624845 | A | G | 0.07281 | -0.06348 | 0.009161 | 4.24E-12  |
| Beta-adrenoceptor blockers-SBP | rs13166730  | T | C | 0.17    | -0.04141 | 0.006541 | 2.439E-10 |
| Beta-adrenoceptor blockers-SBP | rs180940    | G | A | 0.6693  | -0.04251 | 0.005057 | 4.244E-17 |
| Beta-adrenoceptor blockers-SBP | rs2782980   | C | T | 0.7209  | -0.05801 | 0.005283 | 4.773E-28 |
| Beta-adrenoceptor blockers-SBP | rs35320559  | C | T | 0.2248  | 0.03729  | 0.005705 | 6.297E-11 |
| Beta-adrenoceptor blockers-SBP | rs3918226   | T | C | 0.07838 | -0.09769 | 0.00899  | 1.679E-27 |
| Beta-adrenoceptor blockers-SBP | rs68122733  | G | A | 0.1707  | 0.04358  | 0.006329 | 5.759E-12 |
| Beta-adrenoceptor blockers-SBP | rs740746    | A | G | 0.7326  | -0.05422 | 0.005371 | 5.809E-24 |
| Beta-adrenoceptor blockers-SBP | rs740956    | C | T | 0.4364  | 0.03184  | 0.004772 | 2.519E-11 |
| Beta-adrenoceptor blockers-SBP | rs741066    | T | C | 0.2942  | -0.02859 | 0.005201 | 3.872E-08 |
| Beta-adrenoceptor blockers-SBP | rs74157560  | T | C | 0.04578 | -0.0936  | 0.011392 | 2.103E-16 |
| Beta-adrenoceptor blockers-SBP | rs753482    | A | C | 0.7915  | 0.03296  | 0.005901 | 2.325E-08 |
| Beta-adrenoceptor blockers-SBP | rs77021631  | G | A | 0.1831  | 0.04808  | 0.006132 | 4.482E-15 |
| Beta-adrenoceptor blockers-SBP | rs855715    | T | G | 0.1177  | 0.06657  | 0.007504 | 7.232E-19 |
| Beta-adrenoceptor blockers-SBP | rs891511    | A | G | 0.3279  | 0.05557  | 0.005123 | 2.061E-27 |
| Calcium channel blockers-DBP   | rs10764331  | G | A | 0.418   | -0.02625 | 0.002762 | 2.061E-21 |
| Calcium channel blockers-DBP   | rs10828452  | T | A | 0.2049  | 0.01897  | 0.00345  | 3.818E-08 |
| Calcium channel blockers-DBP   | rs10828749  | A | G | 0.4104  | 0.02259  | 0.002793 | 6.088E-16 |
| Calcium channel blockers-DBP   | rs11062219  | T | C | 0.3678  | -0.02065 | 0.002835 | 3.235E-13 |
| Calcium channel blockers-DBP   | rs113210396 | T | G | 0.04499 | 0.03838  | 0.006585 | 5.604E-09 |
| Calcium channel blockers-DBP   | rs11591541  | G | A | 0.1571  | -0.02516 | 0.003751 | 1.978E-11 |
| Calcium channel blockers-DBP   | rs11720002  | C | T | 0.2723  | -0.01922 | 0.003055 | 3.149E-10 |
| Calcium channel blockers-DBP   | rs12258967  | G | C | 0.295   | 0.04153  | 0.002987 | 6.092E-44 |
| Calcium channel blockers-DBP   | rs1277754   | G | A | 0.7107  | 0.0182   | 0.003034 | 1.992E-09 |
| Calcium channel blockers-DBP   | rs1325990   | G | A | 0.5367  | -0.02532 | 0.00274  | 2.486E-20 |
| Calcium channel blockers-DBP   | rs16916944  | T | C | 0.1361  | -0.02668 | 0.004024 | 3.34E-11  |
| Calcium channel blockers-DBP   | rs3774751   | T | G | 0.4617  | 0.01918  | 0.002735 | 2.351E-12 |
| Calcium channel blockers-DBP   | rs3819531   | T | C | 0.7033  | -0.01745 | 0.002971 | 4.29E-09  |
| Calcium channel blockers-DBP   | rs3821843   | A | G | 0.6796  | -0.0255  | 0.002966 | 8.189E-18 |

|                              |             |   |   |         |          |          |           |
|------------------------------|-------------|---|---|---------|----------|----------|-----------|
| Calcium channel blockers-DBP | rs4748478   | A | G | 0.3762  | -0.01853 | 0.002807 | 4.098E-11 |
| Calcium channel blockers-DBP | rs61278674  | G | A | 0.0988  | -0.02709 | 0.004696 | 8.005E-09 |
| Calcium channel blockers-DBP | rs67214975  | A | C | 0.454   | 0.02727  | 0.002742 | 2.666E-23 |
| Calcium channel blockers-DBP | rs7314860   | A | G | 0.1733  | 0.0218   | 0.003654 | 2.434E-09 |
| Calcium channel blockers-DBP | rs7340705   | C | T | 0.3268  | -0.02176 | 0.002931 | 1.13E-13  |
| Calcium channel blockers-DBP | rs76719841  | C | T | 0.0376  | -0.04039 | 0.007201 | 2.036E-08 |
| Calcium channel blockers-PP  | rs10764331  | G | A | 0.418   | -0.02422 | 0.003175 | 2.398E-14 |
| Calcium channel blockers-PP  | rs10828749  | A | G | 0.4104  | 0.01887  | 0.003212 | 4.215E-09 |
| Calcium channel blockers-PP  | rs11248862  | G | A | 0.8731  | 0.02725  | 0.004753 | 9.88E-09  |
| Calcium channel blockers-PP  | rs11591541  | G | A | 0.1571  | -0.03572 | 0.004317 | 1.286E-16 |
| Calcium channel blockers-PP  | rs12258967  | G | C | 0.295   | 0.03851  | 0.003437 | 3.939E-29 |
| Calcium channel blockers-PP  | rs1325990   | G | A | 0.5367  | -0.02449 | 0.003153 | 8.036E-15 |
| Calcium channel blockers-PP  | rs13429172  | C | A | 0.3908  | 0.01778  | 0.003224 | 3.484E-08 |
| Calcium channel blockers-PP  | rs144399820 | C | T | 0.1404  | -0.02991 | 0.00456  | 5.434E-11 |
| Calcium channel blockers-PP  | rs150857355 | C | G | 0.0217  | -0.06581 | 0.010992 | 2.139E-09 |
| Calcium channel blockers-PP  | rs1779246   | A | G | 0.8005  | 0.03021  | 0.003956 | 2.226E-14 |
| Calcium channel blockers-PP  | rs2497818   | G | A | 0.1066  | -0.03132 | 0.005075 | 6.75E-10  |
| Calcium channel blockers-PP  | rs3737984   | T | G | 0.4094  | -0.01829 | 0.003189 | 9.76E-09  |
| Calcium channel blockers-PP  | rs3821843   | A | G | 0.6796  | -0.02322 | 0.003414 | 1.044E-11 |
| Calcium channel blockers-PP  | rs4748472   | T | C | 0.6621  | -0.01831 | 0.003347 | 4.477E-08 |
| Calcium channel blockers-PP  | rs508011    | A | G | 0.3693  | 0.02025  | 0.003274 | 6.224E-10 |
| Calcium channel blockers-PP  | rs67214975  | A | C | 0.454   | 0.02678  | 0.003156 | 2.138E-17 |
| Calcium channel blockers-PP  | rs6792713   | T | G | 0.01564 | -0.07387 | 0.01241  | 2.635E-09 |
| Calcium channel blockers-PP  | rs71384617  | T | C | 0.3557  | 0.01863  | 0.003386 | 3.773E-08 |
| Calcium channel blockers-PP  | rs7894090   | A | G | 0.8551  | 0.02856  | 0.004464 | 1.583E-10 |
| Calcium channel blockers-PP  | rs7902194   | T | A | 0.7389  | 0.02424  | 0.003615 | 2.023E-11 |
| Calcium channel blockers-PP  | rs7920075   | T | C | 0.5289  | 0.018    | 0.003166 | 1.305E-08 |
| Calcium channel blockers-SBP | rs10764331  | G | A | 0.418   | -0.05149 | 0.00481  | 9.835E-27 |
| Calcium channel blockers-SBP | rs10828452  | T | A | 0.2049  | 0.03633  | 0.006013 | 1.52E-09  |
| Calcium channel blockers-SBP | rs10828749  | A | G | 0.4104  | 0.04209  | 0.004865 | 5.097E-18 |
| Calcium channel blockers-SBP | rs11248862  | G | A | 0.8731  | 0.03994  | 0.007188 | 2.749E-08 |
| Calcium channel blockers-SBP | rs113210396 | T | G | 0.04499 | 0.06767  | 0.011487 | 3.84E-09  |
| Calcium channel blockers-SBP | rs11591541  | G | A | 0.1571  | -0.06238 | 0.006535 | 1.363E-21 |
| Calcium channel blockers-SBP | rs116936375 | A | G | 0.03662 | 0.07097  | 0.012751 | 2.606E-08 |
| Calcium channel blockers-SBP | rs12258967  | G | C | 0.295   | 0.08164  | 0.005204 | 1.873E-55 |
| Calcium channel blockers-SBP | rs1277754   | G | A | 0.7107  | 0.03274  | 0.005285 | 5.822E-10 |
| Calcium channel blockers-SBP | rs1325990   | G | A | 0.5367  | -0.05094 | 0.004773 | 1.389E-26 |
| Calcium channel blockers-SBP | rs150857355 | C | G | 0.0217  | -0.1167  | 0.016625 | 2.233E-12 |
| Calcium channel blockers-SBP | rs16916944  | T | C | 0.1361  | -0.04939 | 0.007013 | 1.887E-12 |
| Calcium channel blockers-SBP | rs17123349  | G | A | 0.09325 | -0.04862 | 0.008158 | 2.526E-09 |
| Calcium channel blockers-SBP | rs1779246   | A | G | 0.8005  | 0.04925  | 0.005989 | 1.978E-16 |
| Calcium channel blockers-SBP | rs2497818   | G | A | 0.1066  | -0.05262 | 0.007695 | 8.012E-12 |
| Calcium channel blockers-SBP | rs3819531   | T | C | 0.7033  | -0.02885 | 0.005177 | 2.508E-08 |
| Calcium channel blockers-SBP | rs3821843   | A | G | 0.6796  | -0.0499  | 0.005168 | 4.709E-22 |

|                                        |            |   |   |         |          |          |           |
|----------------------------------------|------------|---|---|---------|----------|----------|-----------|
| Calcium channel blockers-SBP           | rs4748472  | T | C | 0.6621  | -0.0336  | 0.005064 | 3.239E-11 |
| Calcium channel blockers-SBP           | rs61278674 | G | A | 0.0988  | -0.0472  | 0.008178 | 7.864E-09 |
| Calcium channel blockers-SBP           | rs67214975 | A | C | 0.454   | 0.05505  | 0.004777 | 1.013E-30 |
| Calcium channel blockers-SBP           | rs72957281 | C | T | 0.231   | -0.03309 | 0.005625 | 4.05E-09  |
| Calcium channel blockers-SBP           | rs7340705  | C | T | 0.3268  | -0.03579 | 0.005107 | 2.406E-12 |
| Calcium channel blockers-SBP           | rs76719841 | C | T | 0.0376  | -0.08408 | 0.012556 | 2.141E-11 |
| Calcium channel blockers-SBP           | rs7894090  | A | G | 0.8551  | 0.04157  | 0.006758 | 7.691E-10 |
| Calcium channel blockers-SBP           | rs7920075  | T | C | 0.5289  | 0.02926  | 0.004793 | 1.027E-09 |
| Centrally acting antihypertensives-DBP | rs2692938  | A | G | 0.7879  | -0.0212  | 0.003346 | 2.36E-10  |
| Centrally acting antihypertensives-DBP | rs3111873  | C | G | 0.6675  | 0.02543  | 0.002903 | 1.948E-18 |
| Centrally acting antihypertensives-PP  | rs10171471 | C | T | 0.7366  | 0.0283   | 0.003599 | 3.763E-15 |
| Centrally acting antihypertensives-PP  | rs11718509 | A | G | 0.3807  | -0.02143 | 0.003234 | 3.44E-11  |
| Centrally acting antihypertensives-PP  | rs3111873  | C | G | 0.6675  | -0.02408 | 0.003342 | 5.803E-13 |
| Loop diuretics-DBP                     | rs331077   | T | C | 0.425   | -0.02093 | 0.002767 | 3.886E-14 |
| Loop diuretics-DBP                     | rs7718312  | C | T | 0.2845  | 0.02122  | 0.003018 | 2.059E-12 |
| Loop diuretics-MAP                     | rs331077   | T | C | 0.425   | -0.02516 | 0.003265 | 1.292E-14 |
| Loop diuretics-MAP                     | rs7718312  | C | T | 0.2845  | 0.02755  | 0.003561 | 1.033E-14 |
| Loop diuretics-PP                      | rs2015637  | C | T | 0.1009  | 0.06118  | 0.005184 | 3.868E-32 |
| Loop diuretics-PP                      | rs35026266 | T | C | 0.2482  | 0.0239   | 0.003628 | 4.504E-11 |
| Loop diuretics-SBP                     | rs2015637  | C | T | 0.1009  | 0.04711  | 0.007862 | 2.068E-09 |
| Loop diuretics-SBP                     | rs331077   | T | C | 0.425   | -0.03282 | 0.004822 | 1.003E-11 |
| Loop diuretics-SBP                     | rs7718312  | C | T | 0.2845  | 0.03923  | 0.00526  | 8.804E-14 |
| PSDs and aldosterone antagonists-PP    | rs1058161  | T | C | 0.02403 | 0.06098  | 0.010302 | 3.237E-09 |
| PSDs and aldosterone antagonists-PP    | rs2649599  | G | A | 0.7894  | -0.0281  | 0.003948 | 1.096E-12 |
| PSDs and aldosterone antagonists-PP    | rs307349   | T | C | 0.9222  | -0.04558 | 0.005923 | 1.42E-14  |
| PSDs and aldosterone antagonists-PP    | rs35975487 | G | A | 0.05493 | -0.03947 | 0.006838 | 7.832E-09 |
| PSDs and aldosterone antagonists-SBP   | rs307349   | T | C | 0.9222  | -0.05641 | 0.00902  | 4.014E-10 |
| Renin inhibitors-DBP                   | rs11240656 | A | G | 0.4633  | -0.01534 | 0.002742 | 2.223E-08 |
| Renin inhibitors-DBP                   | rs16852778 | T | C | 0.1622  | -0.02162 | 0.003713 | 5.785E-09 |
| Renin inhibitors-DBP                   | rs56305552 | A | G | 0.502   | 0.01499  | 0.002724 | 3.738E-08 |
| Renin inhibitors-SBP                   | rs11240656 | A | G | 0.4633  | -0.03151 | 0.004776 | 4.188E-11 |
| Renin inhibitors-SBP                   | rs4293010  | T | G | 0.9235  | -0.0544  | 0.008956 | 1.251E-09 |
| Thiazides and related diuretics-PP     | rs12141314 | G | A | 0.1695  | -0.02576 | 0.004166 | 6.262E-10 |
| Thiazides and related diuretics-PP     | rs2015637  | C | T | 0.1009  | 0.06118  | 0.005184 | 3.868E-32 |
| Thiazides and related diuretics-PP     | rs2474453  | T | G | 0.4938  | 0.02482  | 0.003194 | 7.778E-15 |
| Thiazides and related diuretics-PP     | rs35026266 | T | C | 0.2482  | 0.0239   | 0.003628 | 4.504E-11 |
| Thiazides and related diuretics-PP     | rs72634852 | T | C | 0.08407 | 0.03435  | 0.005672 | 1.396E-09 |
| Thiazides and related diuretics-SBP    | rs12141314 | G | A | 0.1695  | -0.03636 | 0.00631  | 8.311E-09 |
| Thiazides and related diuretics-SBP    | rs2015637  | C | T | 0.1009  | 0.04711  | 0.007862 | 2.068E-09 |
| Thiazides and related diuretics-SBP    | rs2474453  | T | G | 0.4938  | 0.03381  | 0.004832 | 2.631E-12 |
| Thiazides and related diuretics-SBP    | rs3128290  | T | G | 0.6035  | -0.02723 | 0.004857 | 2.07E-08  |
| Vasodilator antihypertensives-DBP      | rs41464847 | G | A | 0.4798  | -0.02017 | 0.002723 | 1.3E-13   |
| Vasodilator antihypertensives-PP       | rs11024256 | G | T | 0.345   | 0.02403  | 0.00331  | 3.855E-13 |
| Vasodilator antihypertensives-PP       | rs214085   | T | C | 0.4113  | -0.02765 | 0.003186 | 4.045E-18 |

|                                   |            |   |   |        |          |          |           |
|-----------------------------------|------------|---|---|--------|----------|----------|-----------|
| Vasodilator antihypertensives-PP  | rs4526784  | C | G | 0.3742 | 0.02026  | 0.003236 | 3.832E-10 |
| Vasodilator antihypertensives-PP  | rs56228409 | C | A | 0.1541 | -0.02669 | 0.004435 | 1.756E-09 |
| Vasodilator antihypertensives-PP  | rs61755606 | A | G | 0.1079 | 0.03806  | 0.005106 | 9.026E-14 |
| Vasodilator antihypertensives-PP  | rs6855875  | T | C | 0.1906 | -0.02854 | 0.004002 | 9.952E-13 |
| Vasodilator antihypertensives-PP  | rs7928810  | A | C | 0.6238 | 0.03342  | 0.003248 | 7.92E-25  |
| Vasodilator antihypertensives-SBP | rs11024256 | G | T | 0.345  | 0.03557  | 0.005011 | 1.262E-12 |
| Vasodilator antihypertensives-SBP | rs214085   | T | C | 0.4113 | -0.03797 | 0.004827 | 3.665E-15 |
| Vasodilator antihypertensives-SBP | rs4526784  | C | G | 0.3742 | 0.02826  | 0.004899 | 8.022E-09 |
| Vasodilator antihypertensives-SBP | rs7928810  | A | C | 0.6238 | 0.04449  | 0.004914 | 1.387E-19 |

#### LDL-lowering target weighted by LDL

|        |            |   |   |         |        |        |             |
|--------|------------|---|---|---------|--------|--------|-------------|
| APOC3  | rs10790162 | A | G | 0.1     | 0.2305 | 0.0065 | 1.00E-200   |
| APOC3  | rs603446   | C | T | 0.55    | 0.0502 | 0.0034 | 3.91E-43    |
| NPC1L1 | rs10234070 | T | C | 0.09631 | 0.0295 | 0.0059 | 0.00000152  |
| NPC1L1 | rs217386   | G | A | 0.5923  | 0.0363 | 0.0038 | 1.20E-19    |
| NPC1L1 | rs2300414  | A | G | 0.06992 | 0.0353 | 0.008  | 0.00000545  |
| NPC1L1 | rs7791240  | C | T | 0.09103 | 0.0425 | 0.0065 | 1.84E-10    |
| NPC1L1 | rs2073547  | G | A | 0.195   | 0.0485 | 0.0049 | 1.92E-21    |
| HMGCR  | rs12916    | C | T | 0.4314  | 0.0733 | 0.0038 | 7.79E-78    |
| HMGCR  | rs17238484 | T | G | 0.2533  | 0.0627 | 0.0062 | 1.35E-21    |
| HMGCR  | rs2006760  | G | C | 0.229   | 0.0533 | 0.0076 | 1.67E-13    |
| HMGCR  | rs2303152  | A | G | 0.1201  | 0.0423 | 0.0064 | 1.04E-09    |
| HMGCR  | rs5909     | A | G | 0.1016  | 0.0617 | 0.0088 | 4.93E-13    |
| HMGCR  | rs10066707 | A | G | 0.396   | 0.05   | 0.005  | 3.00E-19    |
| PCSK9  | rs10493176 | T | G | 0.885   | 0.078  | 0.01   | 2.50E-14    |
| PCSK9  | rs11206510 | T | C | 0.846   | 0.083  | 0.005  | 2.38E-53    |
| PCSK9  | rs11206514 | A | C | 0.611   | 0.051  | 0.004  | 1.00E-32    |
| PCSK9  | rs11583974 | A | G | 0.03    | 0.065  | 0.012  | 0.000000004 |
| PCSK9  | rs11591147 | G | T | 0.983   | 0.497  | 0.018  | 8.60E-143   |
| PCSK9  | rs12067569 | A | G | 0.034   | 0.089  | 0.01   | 2.00E-17    |
| PCSK9  | rs2479394  | G | A | 0.285   | 0.039  | 0.004  | 1.60E-19    |
| PCSK9  | rs2479409  | G | A | 0.333   | 0.064  | 0.004  | 2.51E-50    |
| PCSK9  | rs2495477  | T | C | 0.6     | 0.064  | 0.005  | 7.30E-30    |
| PCSK9  | rs572512   | T | C | 0.346   | 0.048  | 0.005  | 5.30E-26    |
| PCSK9  | rs585131   | T | C | 0.815   | 0.064  | 0.005  | 2.70E-35    |

#### triglyceride-lowering target weighted by triglyceride

|             |            |   |   |          |       |       |           |
|-------------|------------|---|---|----------|-------|-------|-----------|
| ANGPTL3     | rs4587594  | G | A | 0.69     | 0.069 | 0.004 | 3.50E-82  |
| APOB        | rs676210   | G | A | 0.769    | 0.073 | 0.004 | 3.28E-71  |
| APOA5/APOC3 | rs12280753 | T | C | 6.70E-02 | 0.193 | 0.006 | 1.22E-179 |
| APOA5/APOC3 | rs7350481  | T | C | 0.098    | 0.225 | 0.007 | 1.00E-200 |
| LPL         | rs12678919 | A | G | 0.879    | 0.17  | 0.006 | 1.82E-199 |

#### antidiabetic drug target



|                                 |             |   |   |      |        |       |           |
|---------------------------------|-------------|---|---|------|--------|-------|-----------|
| GLP1R                           | rs10305420  | T | C | 0.39 | -0.051 | 0.016 | 1.30x10-3 |
| GLP1R                           | rs75151020  | C | A | 0.09 | 0.119  | 0.026 | 7.08x10-6 |
| GLP1R                           | rs2268647   | T | C | 0.52 | 0.066  | 0.015 | 1.51x10-5 |
| <b>general glycemic control</b> |             |   |   |      |        |       |           |
| glycemic control                | rs7554251   | C | T | 0.73 | 0.036  | 0.017 | 3.39E-02  |
| glycemic control                | rs1127215   | T | C | 0.42 | -0.065 | 0.016 | 5.67E-05  |
| glycemic control                | rs66464442  | A | C | 0.32 | 0.121  | 0.016 | 2.05E-13  |
| glycemic control                | rs1493694   | T | C | 0.11 | 0.146  | 0.025 | 1.05E-08  |
| glycemic control                | rs145904381 | C | T | 0.01 | -0.266 | 0.071 | 1.98E-04  |
| glycemic control                | rs2297607   | G | A | 0.24 | 0.051  | 0.018 | 4.65E-03  |
| glycemic control                | rs6696888   | A | G | 0.68 | -0.048 | 0.016 | 2.75E-03  |
| glycemic control                | rs7546252   | G | A | 0.56 | -0.092 | 0.015 | 1.97E-09  |
| glycemic control                | rs539515    | C | A | 0.21 | 0.049  | 0.019 | 9.89E-03  |
| glycemic control                | rs2816177   | G | A | 0.41 | 0.049  | 0.016 | 2.25E-03  |
| glycemic control                | rs41304257  | G | A | 0.28 | -0.042 | 0.017 | 1.34E-02  |
| glycemic control                | rs61817176  | C | A | 0.52 | -0.074 | 0.015 | 1.17E-06  |
| glycemic control                | rs10916780  | G | A | 0.2  | -0.045 | 0.019 | 1.77E-02  |
| glycemic control                | rs340874    | C | T | 0.57 | 0.166  | 0.015 | 2.68E-26  |
| glycemic control                | rs1337101   | T | G | 0.32 | -0.095 | 0.016 | 6.05E-09  |
| glycemic control                | rs348330    | A | G | 0.63 | -0.119 | 0.016 | 4.90E-13  |
| glycemic control                | rs10925635  | C | A | 0.64 | 0.046  | 0.016 | 4.09E-03  |
| glycemic control                | rs17261915  | C | T | 0.25 | 0.074  | 0.018 | 4.64E-05  |
| glycemic control                | rs3753693   | T | C | 0.41 | -0.066 | 0.016 | 4.38E-05  |
| glycemic control                | rs61779284  | A | G | 0.21 | 0.13   | 0.019 | 2.58E-11  |
| glycemic control                | rs79090772  | C | T | 0.09 | -0.219 | 0.027 | 3.87E-15  |
| glycemic control                | rs2269247   | T | C | 0.18 | -0.056 | 0.02  | 5.15E-03  |
| glycemic control                | rs11583755  | C | A | 0.36 | 0.107  | 0.016 | 6.88E-11  |
| glycemic control                | rs2613499   | G | A | 0.19 | -0.052 | 0.019 | 6.23E-03  |
| glycemic control                | rs10159026  | T | C | 0.25 | -0.062 | 0.018 | 6.08E-04  |
| glycemic control                | rs2482506   | G | C | 0.25 | -0.053 | 0.018 | 3.29E-03  |
| glycemic control                | rs11196174  | G | A | 0.29 | 0.252  | 0.017 | 4.84E-45  |
| glycemic control                | rs149692182 | T | C | 0.02 | 0.309  | 0.053 | 1.11E-08  |
| glycemic control                | rs35676242  | A | C | 0.05 | 0.23   | 0.036 | 4.33E-10  |
| glycemic control                | rs11257655  | T | C | 0.21 | 0.219  | 0.019 | 2.56E-28  |
| glycemic control                | rs946859    | A | G | 0.47 | -0.075 | 0.015 | 8.44E-07  |
| glycemic control                | rs3122231   | C | T | 0.65 | 0.05   | 0.016 | 1.83E-03  |
| glycemic control                | rs113899647 | T | C | 0.03 | -0.189 | 0.044 | 2.13E-05  |
| glycemic control                | rs949693    | A | G | 0.61 | -0.05  | 0.016 | 1.83E-03  |
| glycemic control                | rs11592899  | A | G | 0.34 | -0.055 | 0.016 | 6.23E-04  |
| glycemic control                | rs2812535   | A | G | 0.62 | 0.069  | 0.016 | 1.98E-05  |
| glycemic control                | rs697239    | C | T | 0.46 | -0.105 | 0.015 | 9.28E-12  |
| glycemic control                | rs11201992  | A | C | 0.46 | -0.038 | 0.015 | 1.13E-02  |
| glycemic control                | rs1111875   | T | C | 0.41 | -0.181 | 0.016 | 2.28E-27  |
| glycemic control                | rs66536955  | C | T | 0.26 | 0.044  | 0.017 | 9.63E-03  |

|                  |             |   |   |      |        |       |          |
|------------------|-------------|---|---|------|--------|-------|----------|
| glycemic control | rs34041345  | G | T | 0.26 | 0.06   | 0.018 | 9.01E-04 |
| glycemic control | rs529623    | C | T | 0.52 | -0.059 | 0.015 | 9.55E-05 |
| glycemic control | rs10893830  | T | C | 0.13 | -0.058 | 0.023 | 1.16E-02 |
| glycemic control | rs10750397  | G | A | 0.72 | -0.04  | 0.017 | 1.85E-02 |
| glycemic control | rs67232546  | T | C | 0.21 | 0.067  | 0.019 | 4.52E-04 |
| glycemic control | rs117316450 | G | C | 0.02 | 0.316  | 0.054 | 9.80E-09 |
| glycemic control | rs757110    | A | C | 0.64 | -0.112 | 0.016 | 9.28E-12 |
| glycemic control | rs11042987  | A | C | 0.58 | -0.034 | 0.016 | 3.33E-02 |
| glycemic control | rs10831668  | T | C | 0.02 | 0.234  | 0.06  | 1.09E-04 |
| glycemic control | rs231362    | G | A | 0.52 | 0.12   | 0.015 | 8.84E-15 |
| glycemic control | rs10767659  | T | G | 0.67 | -0.041 | 0.016 | 1.04E-02 |
| glycemic control | rs60808706  | A | G | 0.05 | -0.227 | 0.035 | 2.40E-10 |
| glycemic control | rs2289488   | C | G | 0.4  | 0.04   | 0.016 | 1.24E-02 |
| glycemic control | rs62618693  | T | C | 0.05 | -0.144 | 0.037 | 1.13E-04 |
| glycemic control | rs523472    | A | G | 0.72 | -0.056 | 0.017 | 1.03E-03 |
| glycemic control | rs7483027   | C | T | 0.38 | -0.061 | 0.016 | 1.54E-04 |
| glycemic control | rs174541    | C | T | 0.36 | -0.098 | 0.016 | 2.07E-09 |
| glycemic control | rs1143756   | G | A | 0.29 | 0.1    | 0.017 | 8.26E-09 |
| glycemic control | rs3918296   | G | C | 0.03 | -0.249 | 0.049 | 5.65E-07 |
| glycemic control | rs11602873  | T | A | 0.16 | -0.187 | 0.021 | 7.97E-18 |
| glycemic control | rs4945090   | A | T | 0.6  | 0.036  | 0.016 | 2.43E-02 |
| glycemic control | rs12802861  | T | C | 0.28 | -0.052 | 0.017 | 2.28E-03 |
| glycemic control | rs10830963  | G | C | 0.28 | 0.297  | 0.017 | 2.61E-61 |
| glycemic control | rs3020069   | A | G | 0.68 | 0.093  | 0.016 | 1.22E-08 |
| glycemic control | rs1426371   | A | G | 0.26 | -0.074 | 0.018 | 4.64E-05 |
| glycemic control | rs79310463  | T | C | 0.13 | 0.104  | 0.023 | 7.91E-06 |
| glycemic control | rs56348580  | C | G | 0.31 | -0.037 | 0.017 | 2.93E-02 |
| glycemic control | rs7975763   | T | C | 0.2  | -0.057 | 0.019 | 2.75E-03 |
| glycemic control | rs11614914  | T | C | 0.33 | 0.078  | 0.016 | 1.54E-06 |
| glycemic control | rs10841886  | C | T | 0.23 | -0.082 | 0.018 | 6.79E-06 |
| glycemic control | rs1480029   | A | G | 0.46 | 0.042  | 0.015 | 5.15E-03 |
| glycemic control | rs3751239   | G | C | 0.2  | -0.16  | 0.019 | 3.68E-16 |
| glycemic control | rs11063018  | C | T | 0.17 | 0.067  | 0.02  | 8.50E-04 |
| glycemic control | rs74862545  | T | C | 0.02 | -0.279 | 0.052 | 1.34E-07 |
| glycemic control | rs2732469   | A | T | 0.43 | -0.258 | 0.015 | 1.57E-59 |
| glycemic control | rs61937817  | G | T | 0.11 | 0.06   | 0.024 | 1.24E-02 |
| glycemic control | rs11173646  | T | A | 0.82 | -0.046 | 0.02  | 2.13E-02 |
| glycemic control | rs2257883   | A | G | 0.13 | 0.15   | 0.023 | 1.93E-10 |
| glycemic control | rs12371967  | C | T | 0.17 | -0.043 | 0.02  | 3.13E-02 |
| glycemic control | rs10879261  | G | T | 0.41 | 0.068  | 0.016 | 2.59E-05 |
| glycemic control | rs11108094  | A | C | 0.07 | 0.099  | 0.03  | 1.01E-03 |
| glycemic control | rs6538805   | C | T | 0.39 | -0.076 | 0.016 | 2.78E-06 |
| glycemic control | rs9587811   | A | C | 0.41 | -0.056 | 0.016 | 4.98E-04 |
| glycemic control | rs314879    | T | C | 0.79 | -0.069 | 0.019 | 3.07E-04 |

|                  |             |   |   |      |        |       |          |
|------------------|-------------|---|---|------|--------|-------|----------|
| glycemic control | rs34584161  | G | A | 0.24 | -0.063 | 0.018 | 4.98E-04 |
| glycemic control | rs380854    | A | G | 0.58 | -0.058 | 0.016 | 3.14E-04 |
| glycemic control | rs9316500   | G | T | 0.29 | -0.067 | 0.017 | 9.26E-05 |
| glycemic control | rs7991679   | A | T | 0.16 | -0.081 | 0.021 | 1.29E-04 |
| glycemic control | rs1215451   | A | G | 0.29 | -0.131 | 0.017 | 7.45E-14 |
| glycemic control | rs2295388   | A | G | 0.22 | -0.073 | 0.019 | 1.37E-04 |
| glycemic control | rs4906272   | T | C | 0.16 | 0.046  | 0.021 | 2.83E-02 |
| glycemic control | rs12883788  | T | C | 0.46 | 0.06   | 0.015 | 7.31E-05 |
| glycemic control | rs7147483   | C | T | 0.25 | -0.158 | 0.018 | 2.22E-17 |
| glycemic control | rs723355    | A | G | 0.5  | -0.034 | 0.015 | 2.32E-02 |
| glycemic control | rs4902002   | A | G | 0.71 | -0.034 | 0.017 | 4.51E-02 |
| glycemic control | rs242105    | C | A | 0.28 | 0.062  | 0.017 | 2.89E-04 |
| glycemic control | rs7156625   | A | G | 0.22 | 0.037  | 0.019 | 5.11E-02 |
| glycemic control | rs8010382   | G | A | 0.41 | 0.046  | 0.016 | 4.09E-03 |
| glycemic control | rs8043085   | T | G | 0.23 | 0.071  | 0.018 | 9.14E-05 |
| glycemic control | rs11856877  | G | A | 0.11 | 0.071  | 0.024 | 3.15E-03 |
| glycemic control | rs1473781   | A | G | 0.35 | 0.067  | 0.016 | 3.37E-05 |
| glycemic control | rs149336329 | T | G | 0.05 | -0.272 | 0.037 | 8.86E-13 |
| glycemic control | rs7163757   | T | C | 0.43 | -0.042 | 0.015 | 5.15E-03 |
| glycemic control | rs7178762   | T | C | 0.55 | -0.057 | 0.015 | 1.61E-04 |
| glycemic control | rs9479      | G | A | 0.49 | 0.052  | 0.015 | 5.61E-04 |
| glycemic control | rs8033589   | A | G | 0.76 | 0.058  | 0.018 | 1.32E-03 |
| glycemic control | rs12910361  | G | A | 0.71 | 0.161  | 0.017 | 7.02E-20 |
| glycemic control | rs893617    | T | C | 0.72 | -0.136 | 0.017 | 8.84E-15 |
| glycemic control | rs2290202   | T | G | 0.13 | 0.085  | 0.023 | 2.41E-04 |
| glycemic control | rs9927842   | C | T | 0.84 | -0.056 | 0.021 | 7.67E-03 |
| glycemic control | rs8056890   | A | G | 0.36 | 0.105  | 0.016 | 1.50E-10 |
| glycemic control | rs8054556   | A | G | 0.47 | 0.077  | 0.015 | 4.37E-07 |
| glycemic control | rs55857387  | C | T | 0.2  | -0.142 | 0.019 | 3.81E-13 |
| glycemic control | rs8061528   | T | C | 0.21 | 0.092  | 0.019 | 1.80E-06 |
| glycemic control | rs2024449   | C | T | 0.44 | -0.056 | 0.015 | 2.09E-04 |
| glycemic control | rs1421085   | C | T | 0.4  | 0.154  | 0.016 | 1.84E-20 |
| glycemic control | rs56125990  | G | A | 0.15 | 0.065  | 0.021 | 2.02E-03 |
| glycemic control | rs4788815   | T | A | 0.66 | 0.056  | 0.016 | 4.98E-04 |
| glycemic control | rs72802365  | C | G | 0.08 | -0.163 | 0.029 | 3.48E-08 |
| glycemic control | rs2966117   | T | G | 0.48 | 0.059  | 0.015 | 9.55E-05 |
| glycemic control | rs11117364  | G | A | 0.68 | 0.066  | 0.017 | 1.17E-04 |
| glycemic control | rs66461358  | C | T | 0.15 | 0.06   | 0.021 | 4.32E-03 |
| glycemic control | rs12934854  | A | G | 0.17 | 0.043  | 0.02  | 3.13E-02 |
| glycemic control | rs925095    | T | C | 0.39 | -0.075 | 0.016 | 3.72E-06 |
| glycemic control | rs2297508   | G | C | 0.65 | -0.15  | 0.016 | 1.59E-19 |
| glycemic control | rs9913225   | A | G | 0.58 | -0.075 | 0.016 | 3.72E-06 |
| glycemic control | rs1109442   | C | T | 0.47 | 0.071  | 0.015 | 3.01E-06 |
| glycemic control | rs3110641   | G | A | 0.78 | 0.091  | 0.019 | 2.31E-06 |

|                  |             |   |   |      |        |       |          |
|------------------|-------------|---|---|------|--------|-------|----------|
| glycemic control | rs11651755  | T | C | 0.51 | -0.124 | 0.015 | 1.20E-15 |
| glycemic control | rs3786017   | C | T | 0.11 | 0.054  | 0.025 | 3.05E-02 |
| glycemic control | rs8071043   | C | T | 0.33 | 0.066  | 0.016 | 4.38E-05 |
| glycemic control | rs1905339   | C | T | 0.34 | 0.097  | 0.016 | 2.96E-09 |
| glycemic control | rs35895680  | A | C | 0.33 | -0.089 | 0.016 | 4.76E-08 |
| glycemic control | rs366577    | T | C | 0.6  | -0.051 | 0.016 | 1.49E-03 |
| glycemic control | rs57767539  | A | G | 0.07 | 0.136  | 0.031 | 1.43E-05 |
| glycemic control | rs11658220  | A | G | 0.1  | 0.1    | 0.025 | 7.31E-05 |
| glycemic control | rs12603589  | C | T | 0.19 | 0.103  | 0.02  | 4.02E-07 |
| glycemic control | rs7224711   | T | C | 0.53 | -0.069 | 0.015 | 5.56E-06 |
| glycemic control | rs303760    | T | C | 0.35 | 0.052  | 0.016 | 1.20E-03 |
| glycemic control | rs16965062  | T | C | 0.43 | 0.034  | 0.015 | 2.32E-02 |
| glycemic control | rs7227272   | A | G | 0.1  | -0.062 | 0.026 | 1.70E-02 |
| glycemic control | rs410150    | T | C | 0.8  | -0.047 | 0.019 | 1.33E-02 |
| glycemic control | rs17596995  | A | G | 0.2  | -0.049 | 0.019 | 9.89E-03 |
| glycemic control | rs1517037   | T | C | 0.19 | -0.093 | 0.02  | 4.42E-06 |
| glycemic control | rs6567160   | C | T | 0.23 | 0.097  | 0.018 | 1.19E-07 |
| glycemic control | rs74625348  | C | G | 0.23 | -0.044 | 0.019 | 2.04E-02 |
| glycemic control | rs12963820  | A | T | 0.27 | 0.034  | 0.017 | 4.51E-02 |
| glycemic control | rs7240767   | C | T | 0.39 | 0.063  | 0.016 | 9.39E-05 |
| glycemic control | rs6565922   | T | C | 0.38 | 0.078  | 0.016 | 1.54E-06 |
| glycemic control | rs9384      | T | G | 0.38 | -0.107 | 0.016 | 6.88E-11 |
| glycemic control | rs10404726  | T | C | 0.47 | -0.035 | 0.015 | 1.95E-02 |
| glycemic control | rs58542926  | T | C | 0.08 | 0.139  | 0.029 | 2.27E-06 |
| glycemic control | rs924150    | C | A | 0.39 | -0.087 | 0.016 | 9.23E-08 |
| glycemic control | rs4805881   | C | A | 0.67 | -0.077 | 0.016 | 2.08E-06 |
| glycemic control | rs429358    | C | T | 0.16 | -0.142 | 0.021 | 4.30E-11 |
| glycemic control | rs8107527   | A | G | 0.28 | 0.105  | 0.017 | 1.53E-09 |
| glycemic control | rs9304665   | A | T | 0.77 | 0.103  | 0.018 | 2.01E-08 |
| glycemic control | rs2115107   | A | G | 0.38 | 0.069  | 0.016 | 1.98E-05 |
| glycemic control | rs116843064 | A | G | 0.02 | -0.15  | 0.055 | 6.41E-03 |
| glycemic control | rs34506349  | A | G | 0.04 | -0.099 | 0.038 | 9.17E-03 |
| glycemic control | rs79950062  | C | T | 0.13 | -0.053 | 0.023 | 2.10E-02 |
| glycemic control | rs9308614   | G | A | 0.15 | -0.09  | 0.022 | 5.04E-05 |
| glycemic control | rs6716394   | A | G | 0.54 | -0.045 | 0.015 | 2.75E-03 |
| glycemic control | rs4668483   | G | A | 0.68 | -0.04  | 0.016 | 1.24E-02 |
| glycemic control | rs10184004  | T | C | 0.41 | -0.115 | 0.016 | 2.68E-12 |
| glycemic control | rs13406280  | T | C | 0.49 | -0.047 | 0.015 | 1.78E-03 |
| glycemic control | rs72917531  | A | C | 0.19 | -0.078 | 0.02  | 1.09E-04 |
| glycemic control | rs36051007  | T | C | 0.32 | -0.035 | 0.017 | 3.92E-02 |
| glycemic control | rs67383253  | C | T | 0.37 | -0.035 | 0.016 | 2.85E-02 |
| glycemic control | rs6712905   | C | T | 0.26 | 0.048  | 0.018 | 7.67E-03 |
| glycemic control | rs4482463   | A | C | 0.92 | -0.063 | 0.029 | 2.96E-02 |
| glycemic control | rs34329895  | G | A | 0.6  | -0.063 | 0.016 | 9.39E-05 |

|                  |            |   |   |      |        |       |          |
|------------------|------------|---|---|------|--------|-------|----------|
| glycemic control | rs2943650  | T | C | 0.65 | 0.143  | 0.016 | 6.10E-18 |
| glycemic control | rs13415288 | C | T | 0.34 | 0.059  | 0.016 | 2.48E-04 |
| glycemic control | rs34339006 | T | C | 0.39 | 0.092  | 0.016 | 1.72E-08 |
| glycemic control | rs1260326  | C | T | 0.61 | 0.156  | 0.016 | 6.16E-21 |
| glycemic control | rs77165542 | T | C | 0.04 | -0.155 | 0.042 | 2.46E-04 |
| glycemic control | rs921069   | G | A | 0.58 | -0.038 | 0.016 | 1.74E-02 |
| glycemic control | rs76675804 | C | T | 0.1  | -0.311 | 0.026 | 2.67E-30 |
| glycemic control | rs10193538 | T | G | 0.61 | 0.072  | 0.016 | 8.71E-06 |
| glycemic control | rs243018   | G | C | 0.45 | 0.088  | 0.016 | 6.64E-08 |
| glycemic control | rs10188334 | T | C | 0.17 | -0.087 | 0.02  | 1.69E-05 |
| glycemic control | rs12185610 | C | A | 0.41 | -0.063 | 0.016 | 9.39E-05 |
| glycemic control | rs4671799  | G | A | 0.68 | -0.036 | 0.016 | 2.43E-02 |
| glycemic control | rs4832290  | C | T | 0.77 | -0.053 | 0.018 | 3.29E-03 |
| glycemic control | rs6137042  | A | G | 0.2  | -0.05  | 0.019 | 8.50E-03 |
| glycemic control | rs7274134  | T | C | 0.25 | -0.062 | 0.018 | 6.08E-04 |
| glycemic control | rs6059662  | G | A | 0.65 | 0.037  | 0.016 | 2.06E-02 |
| glycemic control | rs2038457  | G | A | 0.81 | 0.041  | 0.02  | 4.00E-02 |
| glycemic control | rs12625671 | C | T | 0.11 | 0.118  | 0.025 | 3.20E-06 |
| glycemic control | rs6066138  | A | G | 0.28 | -0.135 | 0.017 | 1.36E-14 |
| glycemic control | rs6021276  | C | T | 0.64 | -0.074 | 0.016 | 4.96E-06 |
| glycemic control | rs865034   | C | T | 0.66 | 0.04   | 0.016 | 1.24E-02 |
| glycemic control | rs4810145  | C | T | 0.52 | 0.068  | 0.015 | 7.51E-06 |
| glycemic control | rs6011155  | C | T | 0.37 | -0.074 | 0.016 | 4.96E-06 |
| glycemic control | rs2240716  | T | C | 0.3  | 0.074  | 0.017 | 1.66E-05 |
| glycemic control | rs56392746 | A | G | 0.09 | -0.138 | 0.026 | 1.81E-07 |
| glycemic control | rs75307421 | A | G | 0.02 | 0.151  | 0.061 | 1.32E-02 |
| glycemic control | rs138771   | G | A | 0.81 | -0.055 | 0.02  | 5.99E-03 |
| glycemic control | rs1801645  | T | C | 0.74 | -0.059 | 0.018 | 1.09E-03 |
| glycemic control | rs17036126 | T | C | 0.13 | 0.127  | 0.023 | 5.92E-08 |
| glycemic control | rs11708067 | G | A | 0.25 | -0.262 | 0.018 | 1.55E-43 |
| glycemic control | rs17036160 | T | C | 0.12 | -0.088 | 0.024 | 2.69E-04 |
| glycemic control | rs9873519  | T | C | 0.53 | 0.097  | 0.015 | 2.70E-10 |
| glycemic control | rs667920   | T | G | 0.77 | 0.038  | 0.018 | 3.45E-02 |
| glycemic control | rs9289556  | T | C | 0.73 | -0.077 | 0.017 | 7.64E-06 |
| glycemic control | rs56243018 | C | A | 0.05 | -0.214 | 0.036 | 5.82E-09 |
| glycemic control | rs28502438 | C | T | 0.43 | -0.051 | 0.016 | 1.49E-03 |
| glycemic control | rs7633673  | A | G | 0.41 | -0.086 | 0.016 | 1.28E-07 |
| glycemic control | rs11706810 | C | T | 0.48 | -0.106 | 0.015 | 5.99E-12 |
| glycemic control | rs13099581 | T | C | 0.14 | -0.06  | 0.022 | 6.41E-03 |
| glycemic control | rs8192675  | C | T | 0.29 | -0.188 | 0.017 | 2.89E-26 |
| glycemic control | rs6444036  | T | G | 0.16 | 0.041  | 0.021 | 5.05E-02 |
| glycemic control | rs9859406  | A | G | 0.31 | 0.167  | 0.017 | 3.21E-21 |
| glycemic control | rs2041965  | T | C | 0.34 | -0.083 | 0.016 | 3.33E-07 |
| glycemic control | rs6777684  | G | A | 0.61 | 0.134  | 0.016 | 5.25E-16 |

|                  |             |   |   |      |        |       |          |
|------------------|-------------|---|---|------|--------|-------|----------|
| glycemic control | rs13094957  | C | T | 0.2  | -0.131 | 0.019 | 1.84E-11 |
| glycemic control | rs1470560   | A | G | 0.37 | 0.037  | 0.016 | 2.06E-02 |
| glycemic control | rs2624847   | T | G | 0.74 | -0.084 | 0.017 | 1.12E-06 |
| glycemic control | rs13434089  | C | T | 0.12 | -0.082 | 0.024 | 6.72E-04 |
| glycemic control | rs9870517   | C | A | 0.4  | -0.096 | 0.016 | 4.24E-09 |
| glycemic control | rs1374915   | C | T | 0.42 | -0.036 | 0.016 | 2.43E-02 |
| glycemic control | rs1523766   | G | A | 0.5  | -0.031 | 0.015 | 3.84E-02 |
| glycemic control | rs978444    | T | G | 0.55 | -0.057 | 0.015 | 1.61E-04 |
| glycemic control | rs3872707   | A | G | 0.12 | 0.049  | 0.023 | 3.29E-02 |
| glycemic control | rs7659468   | G | T | 0.49 | -0.103 | 0.015 | 2.20E-11 |
| glycemic control | rs11728350  | G | A | 0.13 | 0.11   | 0.023 | 2.39E-06 |
| glycemic control | rs77141743  | A | G | 0.16 | 0.045  | 0.021 | 3.19E-02 |
| glycemic control | rs730831    | G | T | 0.04 | -0.123 | 0.041 | 2.75E-03 |
| glycemic control | rs2604918   | T | G | 0.33 | -0.063 | 0.016 | 9.39E-05 |
| glycemic control | rs2125799   | C | T | 0.33 | 0.06   | 0.016 | 1.96E-04 |
| glycemic control | rs28819812  | A | C | 0.32 | -0.06  | 0.016 | 1.96E-04 |
| glycemic control | rs4865436   | G | C | 0.29 | 0.05   | 0.018 | 5.51E-03 |
| glycemic control | rs2169033   | T | C | 0.68 | 0.081  | 0.017 | 2.60E-06 |
| glycemic control | rs55691245  | A | G | 0.14 | -0.16  | 0.022 | 1.51E-12 |
| glycemic control | rs7664347   | C | T | 0.64 | -0.04  | 0.016 | 1.24E-02 |
| glycemic control | rs10938398  | A | G | 0.43 | 0.04   | 0.016 | 1.24E-02 |
| glycemic control | rs1996617   | C | T | 0.29 | 0.101  | 0.017 | 5.93E-09 |
| glycemic control | rs114447556 | T | C | 0.08 | 0.08   | 0.029 | 5.84E-03 |
| glycemic control | rs10937721  | C | G | 0.59 | 0.142  | 0.016 | 1.01E-17 |
| glycemic control | rs73222806  | G | C | 0.05 | 0.098  | 0.035 | 5.15E-03 |
| glycemic control | rs6835992   | G | A | 0.69 | 0.066  | 0.017 | 1.17E-04 |
| glycemic control | rs993380    | G | A | 0.67 | -0.059 | 0.016 | 2.48E-04 |
| glycemic control | rs28408270  | T | G | 0.47 | -0.05  | 0.015 | 9.01E-04 |
| glycemic control | rs1961224   | G | A | 0.35 | -0.065 | 0.016 | 5.67E-05 |
| glycemic control | rs141146025 | A | C | 0.02 | 0.129  | 0.058 | 2.59E-02 |
| glycemic control | rs75432112  | A | G | 0.05 | 0.195  | 0.036 | 1.03E-07 |
| glycemic control | rs329118    | T | C | 0.42 | 0.041  | 0.016 | 1.04E-02 |
| glycemic control | rs111686785 | G | A | 0.03 | 0.182  | 0.044 | 4.18E-05 |
| glycemic control | rs72734782  | G | A | 0.21 | 0.066  | 0.019 | 5.47E-04 |
| glycemic control | rs12514030  | G | T | 0.12 | -0.103 | 0.023 | 9.60E-06 |
| glycemic control | rs1650505   | A | G | 0.21 | 0.06   | 0.019 | 1.64E-03 |
| glycemic control | rs4343858   | A | G | 0.23 | -0.042 | 0.018 | 1.95E-02 |
| glycemic control | rs138373837 | T | C | 0.02 | 0.101  | 0.05  | 4.30E-02 |
| glycemic control | rs62366821  | G | A | 0.49 | -0.055 | 0.015 | 2.69E-04 |
| glycemic control | rs10067659  | C | G | 0.79 | -0.081 | 0.019 | 2.45E-05 |
| glycemic control | rs4865796   | A | G | 0.69 | 0.049  | 0.017 | 3.99E-03 |
| glycemic control | rs464605    | T | C | 0.75 | 0.08   | 0.019 | 3.06E-05 |
| glycemic control | rs34341     | T | A | 0.58 | 0.073  | 0.016 | 6.58E-06 |
| glycemic control | rs7732130   | A | G | 0.68 | -0.132 | 0.016 | 1.36E-15 |

|                  |             |   |   |      |        |       |          |
|------------------|-------------|---|---|------|--------|-------|----------|
| glycemic control | rs6870983   | T | C | 0.21 | -0.067 | 0.019 | 4.52E-04 |
| glycemic control | rs34483452  | A | C | 0.14 | 0.077  | 0.023 | 8.56E-04 |
| glycemic control | rs7752666   | T | C | 0.32 | -0.035 | 0.017 | 3.92E-02 |
| glycemic control | rs80196932  | C | T | 0.16 | -0.064 | 0.021 | 2.36E-03 |
| glycemic control | rs11759026  | G | A | 0.23 | 0.136  | 0.018 | 2.16E-13 |
| glycemic control | rs2876354   | T | C | 0.47 | -0.083 | 0.016 | 3.33E-07 |
| glycemic control | rs7742292   | C | T | 0.4  | 0.041  | 0.016 | 1.04E-02 |
| glycemic control | rs2982521   | T | A | 0.63 | -0.11  | 0.016 | 2.09E-11 |
| glycemic control | rs9390022   | C | T | 0.38 | -0.042 | 0.016 | 8.66E-03 |
| glycemic control | rs1538247   | C | T | 0.3  | 0.093  | 0.017 | 7.76E-08 |
| glycemic control | rs2179168   | A | G | 0.8  | 0.046  | 0.019 | 1.54E-02 |
| glycemic control | rs501470    | G | T | 0.47 | -0.089 | 0.015 | 6.20E-09 |
| glycemic control | rs4709746   | T | C | 0.13 | -0.05  | 0.023 | 2.95E-02 |
| glycemic control | rs7774074   | A | C | 0.21 | 0.039  | 0.019 | 3.98E-02 |
| glycemic control | rs35261542  | A | C | 0.26 | 0.268  | 0.017 | 1.55E-50 |
| glycemic control | rs3117189   | G | A | 0.85 | 0.281  | 0.021 | 3.05E-37 |
| glycemic control | rs7748962   | A | G | 0.77 | 0.113  | 0.018 | 8.41E-10 |
| glycemic control | rs9472139   | C | G | 0.29 | 0.065  | 0.017 | 1.47E-04 |
| glycemic control | rs3798519   | C | A | 0.18 | 0.107  | 0.02  | 1.46E-07 |
| glycemic control | rs9370243   | T | G | 0.08 | 0.079  | 0.028 | 4.82E-03 |
| glycemic control | rs9449295   | C | T | 0.54 | 0.036  | 0.015 | 1.63E-02 |
| glycemic control | rs9379084   | A | G | 0.12 | -0.198 | 0.025 | 1.59E-14 |
| glycemic control | rs187653072 | C | T | 0.03 | 0.134  | 0.044 | 2.38E-03 |
| glycemic control | rs73184014  | G | A | 0.22 | -0.053 | 0.019 | 5.32E-03 |
| glycemic control | rs6976111   | A | C | 0.3  | 0.074  | 0.017 | 1.66E-05 |
| glycemic control | rs13237518  | A | C | 0.41 | 0.048  | 0.016 | 2.75E-03 |
| glycemic control | rs3996350   | C | G | 0.5  | -0.086 | 0.015 | 1.89E-08 |
| glycemic control | rs60251368  | G | A | 0.06 | 0.096  | 0.034 | 4.79E-03 |
| glycemic control | rs4252505   | G | A | 0.06 | 0.07   | 0.031 | 2.38E-02 |
| glycemic control | rs17168486  | T | C | 0.17 | 0.162  | 0.02  | 4.21E-15 |
| glycemic control | rs4725959   | G | A | 0.22 | 0.042  | 0.019 | 2.68E-02 |
| glycemic control | rs10228796  | G | C | 0.55 | 0.16   | 0.015 | 1.33E-24 |
| glycemic control | rs6946660   | C | T | 0.35 | -0.107 | 0.016 | 6.88E-11 |
| glycemic control | rs2188848   | G | A | 0.2  | -0.055 | 0.019 | 3.84E-03 |
| glycemic control | rs860262    | A | C | 0.5  | -0.158 | 0.015 | 4.73E-24 |
| glycemic control | rs917195    | T | C | 0.23 | -0.073 | 0.018 | 5.83E-05 |
| glycemic control | rs730497    | A | G | 0.18 | 0.445  | 0.02  | 4.27E-97 |
| glycemic control | rs73121277  | C | T | 0.28 | 0.084  | 0.017 | 1.12E-06 |
| glycemic control | rs6975279   | A | C | 0.26 | 0.101  | 0.018 | 3.67E-08 |
| glycemic control | rs6956980   | C | T | 0.53 | 0.083  | 0.015 | 5.56E-08 |
| glycemic control | rs7834323   | C | T | 0.29 | -0.074 | 0.017 | 1.66E-05 |
| glycemic control | rs727582    | G | A | 0.34 | -0.093 | 0.016 | 1.22E-08 |
| glycemic control | rs13266634  | T | C | 0.31 | -0.277 | 0.017 | 9.11E-54 |
| glycemic control | rs12056338  | T | G | 0.42 | 0.05   | 0.016 | 1.83E-03 |

|                  |            |   |   |      |        |       |          |
|------------------|------------|---|---|------|--------|-------|----------|
| glycemic control | rs1561927  | T | C | 0.73 | -0.048 | 0.017 | 4.79E-03 |
| glycemic control | rs35753840 | C | A | 0.39 | 0.054  | 0.016 | 7.78E-04 |
| glycemic control | rs13268508 | T | C | 0.38 | 0.087  | 0.016 | 9.23E-08 |
| glycemic control | rs2953845  | T | C | 0.55 | 0.042  | 0.015 | 5.15E-03 |
| glycemic control | rs6558173  | T | G | 0.35 | 0.039  | 0.016 | 1.47E-02 |
| glycemic control | rs2725370  | C | T | 0.7  | -0.049 | 0.017 | 3.99E-03 |
| glycemic control | rs57735787 | G | A | 0.25 | -0.042 | 0.018 | 1.95E-02 |
| glycemic control | rs13262861 | A | C | 0.17 | -0.121 | 0.021 | 1.61E-08 |
| glycemic control | rs7813865  | C | T | 0.29 | 0.041  | 0.017 | 1.58E-02 |
| glycemic control | rs10101067 | C | G | 0.08 | 0.092  | 0.029 | 1.56E-03 |
| glycemic control | rs28792187 | G | A | 0.07 | 0.123  | 0.03  | 4.86E-05 |
| glycemic control | rs1895874  | A | G | 0.5  | 0.048  | 0.015 | 1.42E-03 |
| glycemic control | rs10808671 | G | A | 0.53 | -0.073 | 0.015 | 1.61E-06 |
| glycemic control | rs60384372 | G | A | 0.47 | -0.056 | 0.015 | 2.09E-04 |
| glycemic control | rs1567353  | G | C | 0.31 | 0.035  | 0.017 | 3.92E-02 |
| glycemic control | rs10119430 | A | G | 0.79 | -0.054 | 0.019 | 4.53E-03 |
| glycemic control | rs1431819  | G | A | 0.7  | 0.038  | 0.017 | 2.52E-02 |
| glycemic control | rs10818763 | T | C | 0.13 | -0.108 | 0.023 | 3.58E-06 |
| glycemic control | rs10739629 | T | C | 0.51 | -0.036 | 0.015 | 1.63E-02 |
| glycemic control | rs529565   | C | T | 0.32 | 0.164  | 0.017 | 1.52E-20 |
| glycemic control | rs28642213 | G | A | 0.75 | 0.169  | 0.018 | 1.41E-19 |
| glycemic control | rs12380322 | G | A | 0.39 | 0.051  | 0.016 | 1.49E-03 |
| glycemic control | rs10965247 | G | A | 0.18 | -0.302 | 0.02  | 1.27E-46 |
| glycemic control | rs7018475  | G | T | 0.26 | 0.178  | 0.018 | 1.79E-21 |
| glycemic control | rs11788619 | T | A | 0.03 | -0.134 | 0.048 | 5.28E-03 |
| glycemic control | rs2150854  | T | G | 0.33 | 0.072  | 0.016 | 8.71E-06 |
| glycemic control | rs4237150  | C | G | 0.4  | 0.091  | 0.016 | 2.43E-08 |
| glycemic control | rs67269808 | G | A | 0.06 | -0.13  | 0.032 | 5.67E-05 |
| glycemic control | rs2796441  | A | G | 0.42 | -0.096 | 0.016 | 4.24E-09 |
| glycemic control | rs7023781  | T | C | 0.27 | 0.058  | 0.017 | 6.83E-04 |
| glycemic control | rs10993072 | T | C | 0.32 | 0.083  | 0.016 | 3.33E-07 |
| glycemic control | rs28496034 | G | C | 0.33 | -0.057 | 0.016 | 3.96E-04 |

---



**Table S4. the main results of significant risk factors in univariable MR.**

| outcome | exposure                           | method                              | nsnp | pval     | or   | or_lci95 | or_uci95 |
|---------|------------------------------------|-------------------------------------|------|----------|------|----------|----------|
| LS      | PP                                 | Simple median                       | 76   | 0.032    | 1.05 | 1.00     | 1.10     |
| LS      | PP                                 | Weighted median                     | 76   | 0.338    | 1.02 | 0.97     | 1.08     |
| LS      | PP                                 | MR Egger                            | 76   | 0.888    | 1.01 | 0.89     | 1.14     |
| LS      | PP                                 | IVW (fixed effects)                 | 76   | 0.012    | 1.04 | 1.01     | 1.08     |
| LS      | DBP                                | Simple median                       | 75   | 0.023    | 1.07 | 1.01     | 1.14     |
| LS      | DBP                                | Weighted median                     | 75   | 0.021    | 1.07 | 1.01     | 1.14     |
| LS      | DBP                                | MR Egger                            | 75   | 0.606    | 0.96 | 0.82     | 1.12     |
| LS      | DBP                                | IVW (fixed effects)                 | 75   | 0.003    | 1.06 | 1.02     | 1.11     |
| LS      | SBP                                | Simple median                       | 98   | 0.010    | 1.04 | 1.01     | 1.08     |
| LS      | SBP                                | Weighted median                     | 98   | 0.002    | 1.05 | 1.02     | 1.08     |
| LS      | SBP                                | MR Egger                            | 98   | 0.036    | 1.12 | 1.01     | 1.24     |
| LS      | SBP                                | IVW (fixed effects)                 | 98   | 4.64E-07 | 1.06 | 1.03     | 1.08     |
| LS      | HDL cholesterol    id:ieu-b-109    | Simple median                       | 257  | 0.144    | 0.87 | 0.72     | 1.05     |
| LS      | HDL cholesterol    id:ieu-b-109    | Weighted median                     | 257  | 0.390    | 0.92 | 0.77     | 1.11     |
| LS      | HDL cholesterol    id:ieu-b-109    | MR Egger                            | 257  | 0.111    | 0.87 | 0.73     | 1.03     |
| LS      | HDL cholesterol    id:ieu-b-109    | IVW (multiplicative random effects) | 257  | 0.008    | 0.86 | 0.76     | 0.96     |
| LS      | apolipoprotein A-I    id:ieu-b-107 | Simple median                       | 226  | 0.217    | 0.89 | 0.73     | 1.07     |
| LS      | apolipoprotein A-I    id:ieu-b-107 | Weighted median                     | 226  | 0.554    | 0.95 | 0.79     | 1.13     |
| LS      | apolipoprotein A-I    id:ieu-b-107 | MR Egger                            | 226  | 0.352    | 0.91 | 0.76     | 1.10     |
| LS      | apolipoprotein A-I    id:ieu-b-107 | IVW (multiplicative random effects) | 226  | 0.034    | 0.88 | 0.78     | 0.99     |
| LS      | triglycerides    id:ieu-b-111      | Simple median                       | 234  | 0.001    | 1.45 | 1.18     | 1.80     |
| LS      | triglycerides    id:ieu-b-111      | Weighted median                     | 234  | 0.386    | 1.08 | 0.91     | 1.29     |
| LS      | triglycerides    id:ieu-b-111      | MR Egger                            | 234  | 0.861    | 1.02 | 0.85     | 1.21     |
| LS      | triglycerides    id:ieu-b-111      | IVW (multiplicative random effects) | 234  | 0.028    | 1.14 | 1.01     | 1.29     |
| LS      | apolipoprotein B    id:ieu-b-108   | Simple median                       | 142  | 0.190    | 1.14 | 0.94     | 1.39     |
| LS      | apolipoprotein B    id:ieu-b-108   | Weighted median                     | 142  | 0.546    | 1.06 | 0.88     | 1.26     |
| LS      | apolipoprotein B    id:ieu-b-108   | MR Egger                            | 142  | 0.377    | 1.09 | 0.90     | 1.31     |
| LS      | apolipoprotein B    id:ieu-b-108   | IVW (multiplicative random effects) | 142  | 0.030    | 1.15 | 1.01     | 1.31     |
| LS      | Type 2 diabetes                    | Simple median                       | 113  | 0.001    | 1.16 | 1.06     | 1.26     |
| LS      | Type 2 diabetes                    | Weighted median                     | 113  | 0.007    | 1.15 | 1.04     | 1.28     |
| LS      | Type 2 diabetes                    | MR Egger                            | 113  | 0.190    | 1.09 | 0.96     | 1.24     |
| LS      | Type 2 diabetes                    | IVW (fixed effects)                 | 113  | 1.02E-04 | 1.12 | 1.06     | 1.18     |
| LS      | Height                             | Simple median                       | 290  | 0.204    | 0.92 | 0.81     | 1.05     |
| LS      | Height                             | Weighted median                     | 290  | 0.278    | 0.93 | 0.81     | 1.06     |

|    |                     |                                     |     |       |      |      |       |
|----|---------------------|-------------------------------------|-----|-------|------|------|-------|
| LS | Height              | MR Egger                            | 290 | 0.034 | 0.76 | 0.59 | 0.98  |
| LS | Height              | IVW (multiplicative random effects) | 290 | 0.011 | 0.88 | 0.81 | 0.97  |
| LS | Education           | Simple median                       | 30  | 0.075 | 0.59 | 0.33 | 1.05  |
| LS | Education           | Weighted median                     | 30  | 0.084 | 0.58 | 0.32 | 1.07  |
| LS | Education           | MR Egger                            | 30  | 0.568 | 0.46 | 0.03 | 6.56  |
| LS | Education           | IVW (fixed effects)                 | 30  | 0.006 | 0.55 | 0.36 | 0.84  |
| LS | Fasting proinsulin  | Simple median                       | 9   | 0.030 | 2.19 | 1.08 | 4.45  |
| LS | Fasting proinsulin  | Weighted median                     | 9   | 0.024 | 1.80 | 1.08 | 3.00  |
| LS | Fasting proinsulin  | MR Egger                            | 9   | 0.517 | 1.29 | 0.62 | 2.66  |
| LS | Fasting proinsulin  | IVW (fixed effects)                 | 9   | 0.012 | 1.54 | 1.10 | 2.15  |
| LS | Fibrinogen          | Simple median                       | 33  | 0.245 | 2.13 | 0.59 | 7.65  |
| LS | Fibrinogen          | Weighted median                     | 33  | 0.153 | 2.36 | 0.73 | 7.67  |
| LS | Fibrinogen          | MR Egger                            | 33  | 0.171 | 5.13 | 0.52 | 50.58 |
| LS | Fibrinogen          | IVW (fixed effects)                 | 33  | 0.020 | 2.52 | 1.16 | 5.47  |
| LS | Atrial fibrillation | Simple median                       | 74  | 0.357 | 0.95 | 0.85 | 1.06  |
| LS | Atrial fibrillation | Weighted median                     | 74  | 0.288 | 0.95 | 0.85 | 1.05  |
| LS | Atrial fibrillation | MR Egger                            | 74  | 0.111 | 0.90 | 0.79 | 1.02  |
| LS | Atrial fibrillation | IVW (fixed effects)                 | 74  | 0.010 | 0.92 | 0.86 | 0.98  |

---

**Table S5. Multivariable MR estimates for blood pressure and lipids.**

| Outcome | Method   | SNP N | Exposure | BETA   | SE    | p-value |
|---------|----------|-------|----------|--------|-------|---------|
| ls      | IVW      | 255   | DBP      | 0.082  | 0.235 | 0.729   |
|         |          |       | SBP      | -0.024 | 0.239 | 0.919   |
|         |          |       | PP       | 0.064  | 0.241 | 0.789   |
|         | MR-Egger | 255   | DBP      | 0.08   | 0.237 | 0.735   |
|         |          |       | SBP      | -0.025 | 0.239 | 0.918   |
|         |          |       | PP       | 0.065  | 0.241 | 0.788   |
| ls      | IVW      | 384   | ApoB     | 0.171  | 0.296 | 0.564   |
|         |          |       | LDL      | -0.136 | 0.315 | 0.665   |
|         |          |       | TG       | 0.196  | 0.071 | 0.005*  |
|         | MR-Egger | 384   | ApoB     | 0.14   | 0.295 | 0.636   |
|         |          |       | LDL      | -0.192 | 0.316 | 0.543   |
|         |          |       | TG       | 0.151  | 0.075 | 0.045*  |
|         | MR-Lasso | 357   | ApoB     | -0.006 | 0.261 | 0.98    |
|         |          |       | LDL      | 0.035  | 0.28  | 0.902   |
|         |          |       | TG       | 0.261  | 0.063 | 0.000*  |
| ls      | IVW      | 435   | ApoAI    | 0.023  | 0.187 | 0.900   |
|         |          |       | HDL      | -0.201 | 0.178 | 0.26    |
|         | MR-Egger | 435   | ApoAI    | 0.065  | 0.194 | 0.738   |
|         |          |       | HDL      | -0.187 | 0.179 | 0.296   |
|         | MR-Lasso | 408   | ApoAI    | -0.046 | 0.167 | 0.783   |
|         |          |       | HDL      | -0.149 | 0.161 | 0.354   |

**Table S6. MR-Egger intercept and Q test result in the study.**

| outcome          | exposure                       | IVW-Q test  |          | Egger regression (intercept) |       |       |
|------------------|--------------------------------|-------------|----------|------------------------------|-------|-------|
|                  |                                | Q-statistic | Q_pval   | egger_intercept              | se    | pval  |
| univariable MR   |                                |             |          |                              |       |       |
| lacunar stroke   | PP                             | 90.6        | 0.106    | 0.005                        | 0.010 | 0.589 |
| lacunar stroke   | DBP                            | 90.0        | 0.099    | 0.014                        | 0.011 | 0.178 |
| lacunar stroke   | SBP                            | 106.6       | 0.238    | -0.013                       | 0.012 | 0.256 |
| lacunar stroke   | HDL                            | 326.9       | 0.002    | 0.000                        | 0.003 | 0.873 |
| lacunar stroke   | apolipoprotein A-I             | 289.5       | 0.002    | -0.001                       | 0.003 | 0.614 |
| lacunar stroke   | triglycerides                  | 313.7       | 0.000    | 0.005                        | 0.003 | 0.073 |
| lacunar stroke   | apolipoprotein B               | 195.6       | 0.002    | 0.003                        | 0.004 | 0.394 |
| lacunar stroke   | Type 2 diabetes                | 291.8       | 0.142    | 0.004                        | 0.003 | 0.153 |
| lacunar stroke   | Height                         | 391.2       | 0.000    | 0.005                        | 0.004 | 0.209 |
| lacunar stroke   | Education                      | 20.0        | 0.894    | 0.003                        | 0.024 | 0.891 |
| lacunar stroke   | Fasting proinsulin             | 11.2        | 0.190    | 0.009                        | 0.015 | 0.578 |
| lacunar stroke   | Fibrinogen                     | 63.6        | 0.001    | -0.008                       | 0.011 | 0.491 |
| lacunar stroke   | Atrial fibrillation            | 108.0       | 0.083    | 0.004                        | 0.005 | 0.405 |
| multivariable MR |                                |             |          |                              |       |       |
| lacunar stroke   | blood pressure: PP SBP PP      | 287.6       | 0.061    | 0.000                        | 0.003 | 0.951 |
| lacunar stroke   | lipids: ApoB LDL TG            | 524.0       | 0.000    | 0.003                        | 0.002 | 0.085 |
| lacunar stroke   | lipids: apolipoprotein A-I HDL | 550.2       | 1.00E-04 | -0.002                       | 0.002 | 0.434 |
